# Supplementary material for: Augmentation of myocardial If dysregulates calcium homeostasis and causes adverse cardiac remodeling
Source: PubMed Central journal article supplement (PMC6650438; doi:10.1038/s41467-019-11261-2), 2019-07-23
Supplement: 41467_2019_11261_MOESM1_ESM.pdf [file 41467_2019_11261_MOESM1_ESM.pdf]

## **Supplementary Information**

### **Augmentation of myocardial $I_f$ dysregulates calcium homeostasis and causes adverse cardiac remodeling**

Yampolsky et al.

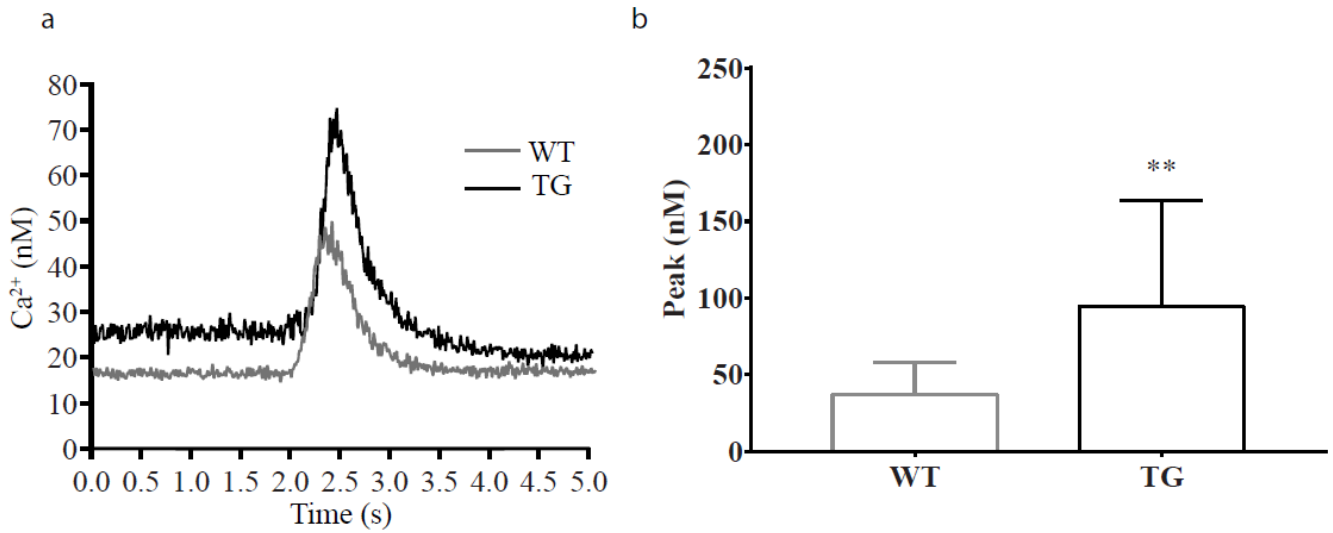

### Supplementary Figure 1

Experiments were performed in isolated cardiomyocyte preparation (load with 10  $\mu\text{M}$  Fluo4-AM, puff with caffeine 10 mM). Quantification of the amplitude [peak] of caffeine-induced  $\text{Ca}^{2+}$  transients, which serves as a measure for sarcoplasmic reticulum  $\text{Ca}^{2+}$  content. **a**, representative  $\text{Ca}^{2+}$  transients. **b**, results of the experiment (transgenic  $\text{HCN4}^{\text{tg/wt}}$  cells = TG [n=20]; wild type cells = WT [n=12]; mean  $\pm$  standard deviation; \*\*P<0.01 TG vs. WT; two-tailed Mann-Whitney test). Source data are provided as a Source data file.

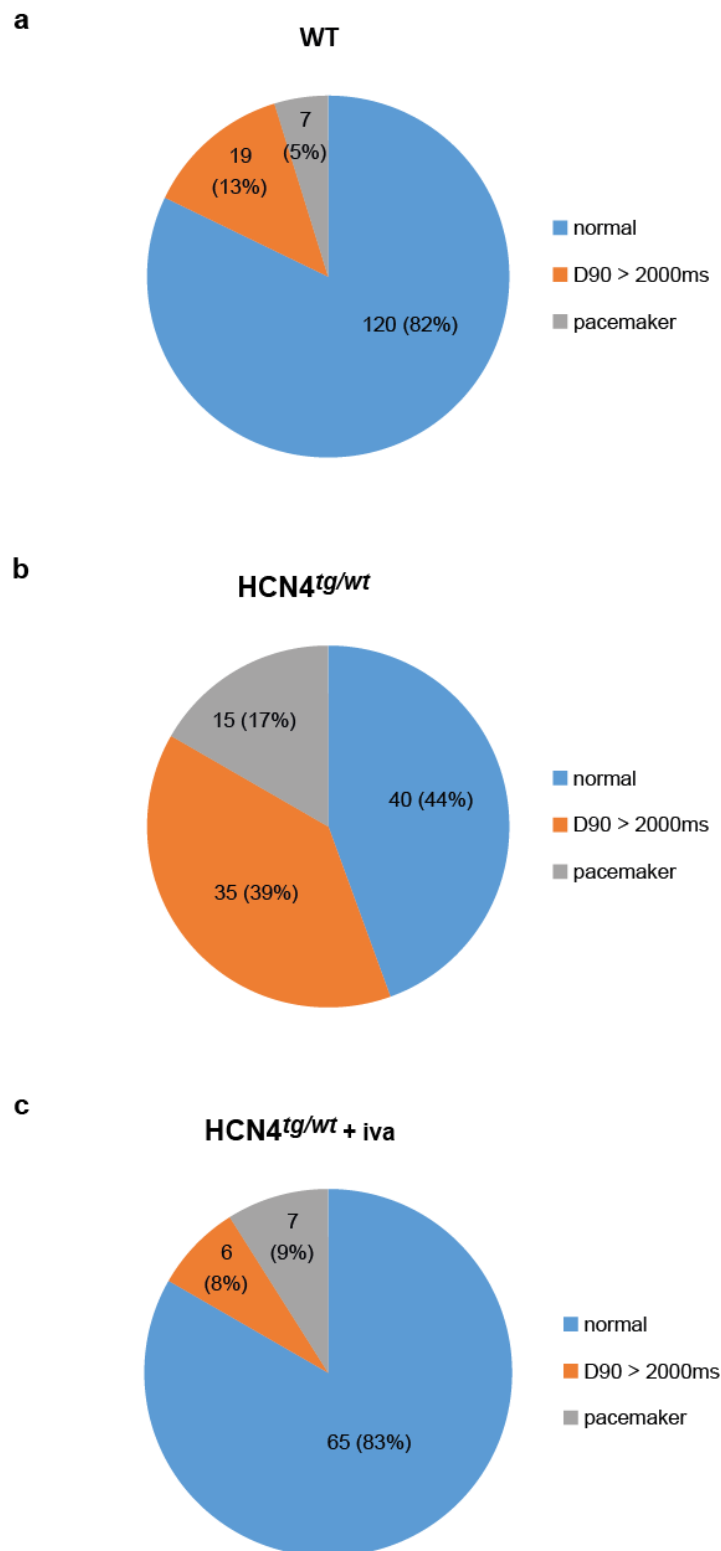

## Supplementary Figure 2

Properties of  $\text{Ca}^{2+}$  transients recorded from isolated cardiomyocytes of wild type and *HCN4<sup>tg/wt</sup>* hearts. **a**, cardiomyocytes isolated from wild type mice predominantly showed normal behaviour, lacking automaticity (defined as spontaneous beating rate  $>0.2$  Hz) or prolonged decay of diastolic  $[\text{Ca}^{2+}]_i$  (defined as  $D_{90} > 2000\text{ms}$ ). **b**, In contrast, considerable numbers of cardiomyocytes from *HCN4<sup>tg/wt</sup>* mice revealed spontaneous pacemaker activity, characterized by periodic firing of  $[\text{Ca}^{2+}]_i$  transients, or  $[\text{Ca}^{2+}]_i$  transients with abnormal prolongation of diastolic  $[\text{Ca}^{2+}]_i$  decay (defined as  $D_{90} > 2000\text{ms}$ ). **c**, These changes recovered to the wild type situation when *HCN4<sup>tg/wt</sup>* cardiomyocytes were pre-treated with ivabradine ( $3 \mu\text{M}$ ). Notably, only  $[\text{Ca}^{2+}]_i$  transients with normal configuration were used for the evaluation according to Figures 5 and 6 of the main manuscript.

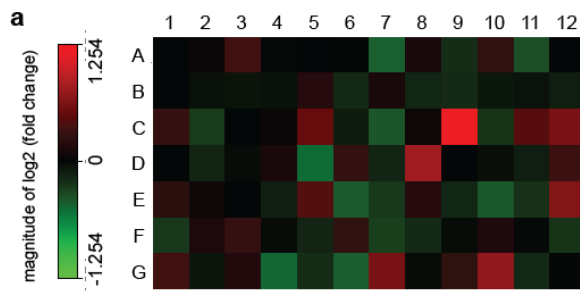

**b**

|   | 1                | 2               | 3              | 4              | 5              | 6               | 7               | 8                  | 9                  | 10               | 11               | 12                |
|---|------------------|-----------------|----------------|----------------|----------------|-----------------|-----------------|--------------------|--------------------|------------------|------------------|-------------------|
| A | Akt1<br>1.00     | Apaf1<br>1.02   | Api5<br>1.27   | Atf5<br>-1.01  | Bad<br>1.00    | Bag1<br>-1.00   | Bag3<br>-1.38   | Bak1<br>1.08       | Bax<br>-1.16       | Bcl10<br>1.20    | Bcl2<br>-1.31    | Bcl2l1<br>1.00    |
| B | Bcl2l10<br>1.00  | Bcl2l2<br>-1.04 | Bid<br>-1.05   | Naip1<br>-1.04 | Naip2<br>1.14  | Birc2<br>-1.14  | Birc3<br>1.08   | Xiap<br>-1.13      | Birc5<br>-1.15     | Bnip2<br>-1.06   | Bnip3<br>-1.04   | Bnip3l<br>-1.09   |
| C | Bok<br>1.22      | Card10<br>-1.22 | Nod1<br>1.00   | Card6<br>1.02  | Casp1<br>1.43  | Casp12<br>-1.09 | Casp14<br>-1.33 | Casp2<br>1.03      | Casp3<br>2.39      | Casp4<br>-1.19   | Casp6<br>1.36    | Casp7<br>1.51     |
| D | Casp8<br>1.00    | Casp9<br>-1.11  | Cflar<br>-1.02 | Cidea<br>1.09  | Cideb<br>-1.44 | Cradd<br>1.21   | Dad1<br>-1.11   | Dapk1<br>1.73      | Dffa<br>-1.00      | Dffb<br>-1.03    | Tsc22d3<br>-1.09 | Fadd<br>1.25      |
| E | Fas<br>1.16      | Fasl<br>1.05    | Hells<br>1.00  | Il10<br>-1.10  | Lhx4<br>1.34   | Ltbr<br>-1.36   | Mcl1<br>-1.21   | Nfkb1<br>1.14      | Nme5<br>-1.13      | Nol3<br>-1.35    | Pak7<br>-1.18    | Pim2<br>1.57      |
| F | Polb<br>-1.21    | Prdx2<br>1.09   | Pycard<br>1.22 | Ripk1<br>-1.02 | Rnf7<br>-1.12  | Sphk2<br>1.20   | Tnf<br>-1.24    | Tnfrsf10b<br>-1.15 | Tnfrsf11b<br>-1.02 | Tnfrsf1a<br>1.10 | Cd40<br>-1.01    | Tnfrsf10<br>-1.20 |
| G | Tnfrsf12<br>1.27 | Cd40lg<br>-1.06 | Cd70<br>1.11   | Traf1<br>-1.42 | Traf2<br>-1.16 | Traf3<br>-1.37  | Trp53<br>1.51   | Trp53bp2<br>-1.02  | Trp53inp1<br>1.18  | Trp63<br>1.63    | Trp73<br>-1.14   | Zc3hc1<br>-1.01   |

### Supplementary Figure 3

Mouse apoptosis array. a, b. Heat map representation (a) and numerical data (b) of apoptosis related gene expression in *HCN4<sup>tg/wt</sup>* as fold-change of wild type values (wt = 1.0). 96-well positions are indicated with expression levels colour-coded in black (no change), red (increased level) and green (decreased level).

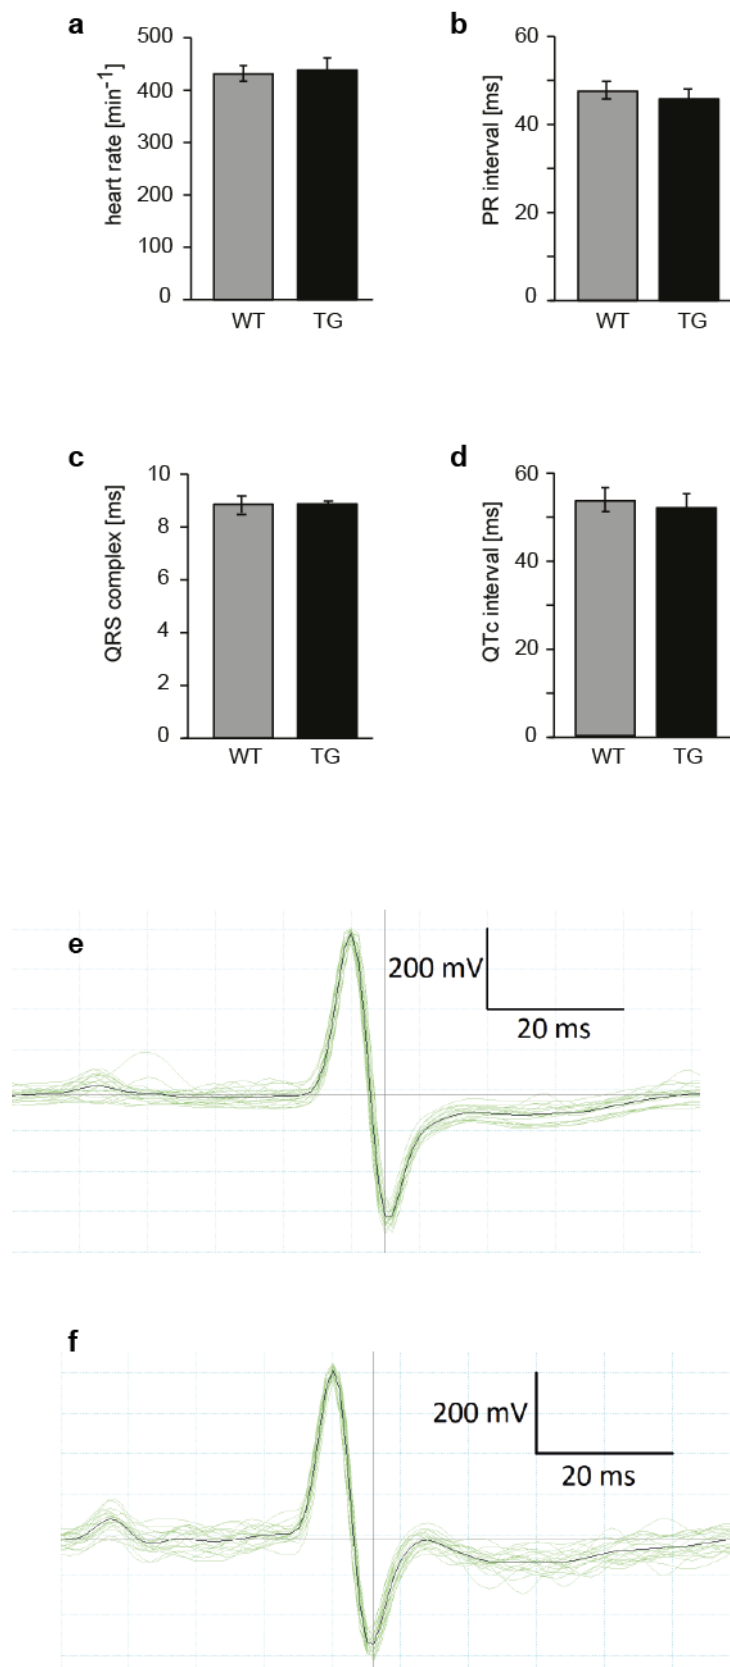

#### Supplementary Figure 4

Key surface ECG parameters in anaesthetized mice (3 months of age). a-d. heart rate (a), PR interval (b), QRS complex (c) and QTc interval (d) measured in 3 months-old wild type (WT, grey columns, n= 23 animals) and *HCN4<sup>tg/wt</sup>* (TG, black columns, n = 6 animals) mice. Data are presented as mean  $\pm$  s.e.m. \* P<0.05, \*\* P<0.01, \*\*\* P<0.001; unpaired t-test. **e**, **f** Representative ECG complexes as overlay of 50 consecutive complexes from wild type (**e**) and transgenic (**f**) mice. Source data are provided as a Source data file.

Figure 1c

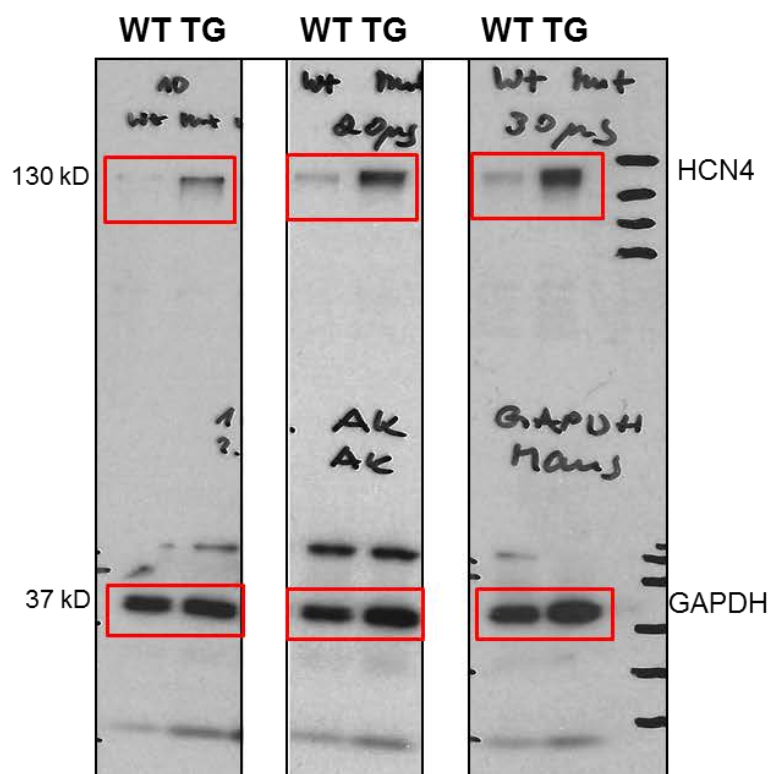

Figure 4f

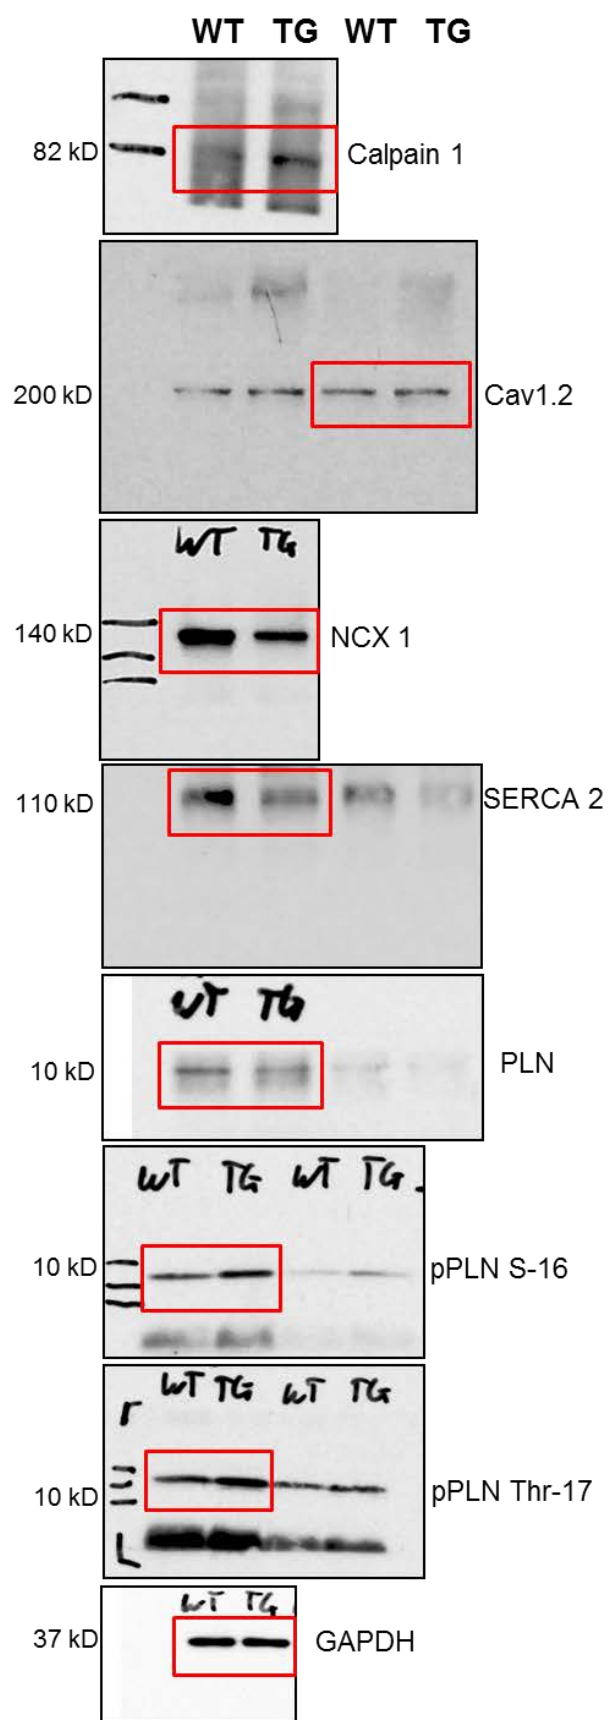

Supplementary Figure 5

Western blot images used to compose result panels in indicated figures.

|                              | <b>WT</b>    | <b><i>HCN4</i><sup>+tg</sup></b> | <b><i>P</i> value</b> |
|------------------------------|--------------|----------------------------------|-----------------------|
| N                            | 5            | 5                                |                       |
| RR Interval (ms)             | 107.3 ± 5.5  | 106.7 ± 11.2                     | 0.92                  |
| Heart Rate (BPM)             | 569.4 ± 27.1 | 576.9 ± 52.8                     | 0.79                  |
| PR Interval (ms)             | 37.2 ± 1.9   | 35.5 ± 1.3                       | 0.14                  |
| P Duration (ms)              | 14.4 ± 1.3   | 13.7 ± 1.4                       | 0.44                  |
| QRS interval (ms)            | 16.3 ± 0.9   | 16.1 ± 1.6                       | 0.82                  |
| QTc (ms)                     | 46.9 ± 3.1   | 50.8 ± 2.1                       | 0.053                 |
| PVCs / 10 <sup>4</sup> beats | 1.6 ± 1.1    | 18.4 ± 5.5                       | 0.018                 |
| Mice with nonsustained VT    | 0            | 3                                | 0,1667                |

Abbreviations and definitions: BPM beats per minute, PVCs premature ventricular captures, VT ventricular tachycardia. Nonsustained VT, ≥ 3 consecutive ventricular beats.

### Supplementary Table 1

Ambulatory telemetry of wild type (WT) and transgenic (*HCN4*<sup>+tg</sup>) mice (6 months of age). Data are presented as mean ± s.e.m. Source data are provided as a Source data file.

| Human target gene | Human target protein                    | Primer accession number<br>(TaqMan assay) |
|-------------------|-----------------------------------------|-------------------------------------------|
| <i>GAPDH</i>      | GAPDH                                   | Mm99999915_m1                             |
| <i>HPRT1</i>      | HPRT1                                   | Mm00446968_m1                             |
| <i>ACTB</i>       | β-actin                                 | Mm00607939_m1                             |
| <i>SCN5A</i>      | Na <sub>v</sub> 1.5                     | Mm00451971_m1                             |
| <i>SLC8A1</i>     | NCX                                     | Mm01232254_m1                             |
| <i>Ryr2</i>       | RyR2                                    | Mm00465877_m1                             |
| <i>CACNA1C</i>    | Ca <sub>v</sub> 1.2                     | Mm00437917_m1                             |
| <i>CACNA1D</i>    | Ca <sub>v</sub> 1.3                     | Mm01209919_m1                             |
| <i>CACNA1A</i>    | Ca <sub>v</sub> 2.1                     | Mm_00432190_m1                            |
| <i>CACNA1G</i>    | Ca <sub>v</sub> 3.1                     | Mm00486572_m1                             |
| <i>KCNJ2</i>      | K <sub>ir</sub> 2.1                     | Mm00434616_m1                             |
| <i>KCNA4</i>      | K <sub>v</sub> 1.4                      | Mm00445241_s1                             |
| <i>KCNA5</i>      | K <sub>v</sub> 1.5                      | Mm00524346_s1                             |
| <i>KCND2</i>      | K <sub>v</sub> 4.2                      | Mm01161732_m1                             |
| <i>KCND3</i>      | K <sub>v</sub> 4.3                      | Mm01302126_m1                             |
| <i>KCNQ1</i>      | K <sub>v</sub> 7.1                      | Mm00434640_m1                             |
| <i>KCNH2</i>      | hERG                                    | Mm00465370_m1                             |
| <i>KCNIP2</i>     | KChip2                                  | Mm00518915_g1                             |
| <i>mHCN1</i>      | mHCN1                                   | Mm00468832_m1                             |
| <i>mHCN2</i>      | mHCN2                                   | Mm00468538_m1                             |
| <i>mHCN4</i>      | mHCN4                                   | Mm01176086_m1                             |
| <i>hHCN4</i>      | hHCN4                                   | Hs00175760_m1                             |
| <i>Myh7b</i>      | Myosin heavy chain 7B                   | Mm01249941_m1                             |
| <i>ATP2a2</i>     | Serca2a                                 | Mm01201431_m1                             |
| <i>Pln</i>        | Pln                                     | Mm04206541_m1                             |
| <i>Ppp3ca</i>     | Caln                                    | Mm01317678_m1                             |
| <i>Atp1a1</i>     | Na <sup>+</sup> /K <sup>+</sup> -ATPase | Mm00523255_m1                             |
| <i>Nppa</i>       | ANP                                     | Mm01255747_g1                             |
| <i>Casp3</i>      | Casp3                                   | Mm01195085_m1                             |
| <i>Tgm2</i>       | tTG                                     | Mm00436987_m1                             |
| <i>Capn1</i>      | Capn1                                   | Mm00482964_m1                             |
| <i>Mtor</i>       | mTOR                                    | Mm00444968_m1                             |
| <i>Gsk3b</i>      | GSK-3B                                  | Mm00444911_m1                             |

### Supplementary Table 2

Primers used for quantitative real-time polymerase chain reaction (qRT-PCR).



| <b>Primary antibody</b>                                                | <b>Secondary antibody</b>                                                     |
|------------------------------------------------------------------------|-------------------------------------------------------------------------------|
| Anti-NCX1 antibody ab135735<br>(IgG, rabbit, abcam)                    | Anti-Rabbit IgG (whole molecule) Peroxidase<br>(A6154) (Sigma-Aldrich)        |
| Anti-Ca <sub>v</sub> 1.2 (#ACC-003)<br>(IgG, rabbit, Alomone Labs)     | Anti-Rabbit IgG (whole molecule) Peroxidase<br>(A6154) (Sigma-Aldrich)        |
| Anti-Serca2 (F-1): sc-376235<br>(IgG, mouse, Santa Cruz Biotechnology) | Goat anti-mouse IgG-HRP: Sc-2005<br>(Santa Cruz Biotechnology)                |
| Anti-Phospholamban antibody [2D12]<br>(ab2865) (IgG, mouse, abcam)     | Goat anti-mouse IgG-HRP: Sc-2005<br>(Santa Cruz Biotechnology)                |
| A010-12 Anti-phospho-PLB (Ser-16)<br>(IgG, rabbit, Badrilla)           | Anti-Rabbit IgG (whole molecule) Peroxidase<br>(A6154) (Sigma-Aldrich)        |
| A010-13 anti-phospho-PLB (Thr-17)<br>(IgG, rabbit, Badrilla)           | Anti-Rabbit IgG (whole molecule) Peroxidase<br>(A6154) (Sigma-Aldrich)        |
| Anti-Calpain 1 antibody (ab28258)<br>(IgG, rabbit, abcam)              | Anti-Rabbit IgG (whole molecule) Peroxidase<br>(A6154) (Sigma-Aldrich)        |
| Anti-HCN4 (#APC-052)<br>(IgG, rabbit, Alomone Labs)                    | Anti-Rabbit IgG (H+L), F(ab) fragment-<br>Peroxidase antibody (Sigma-Aldrich) |
| GAPDH (HRP) G8140-11 Mab<br>(IgG, mouse, Us Biologicals)               | Goat anti-mouse IgG-HRP: Sc-2005<br>(Santa Cruz Biotechnology)                |

### **Supplementary Table 3**

Antibodies used for immunocytochemical assays.
